# Supplementary material for: Medicines for Malaria Venture Pandemic Box In Vitro Screening Identifies Compounds Highly Active against the Tachyzoite Stage of Toxoplasma gondii
Source: MDPI journal article supplement (doi:10.3390/tropicalmed8120510), 2023-11-29
Supplement: s1 [file s1]

Supplementary Figure S1

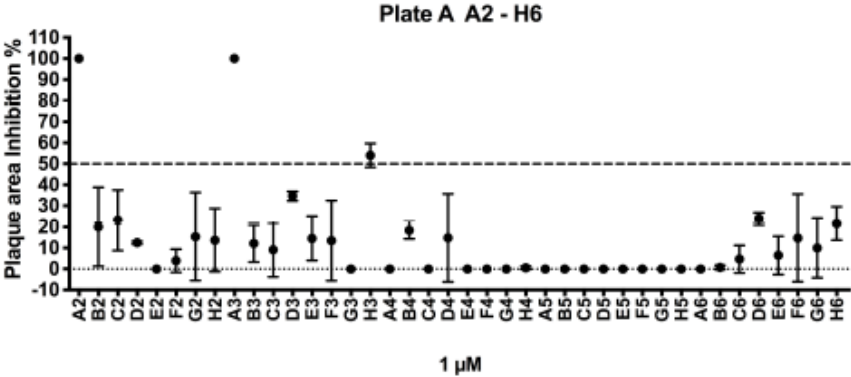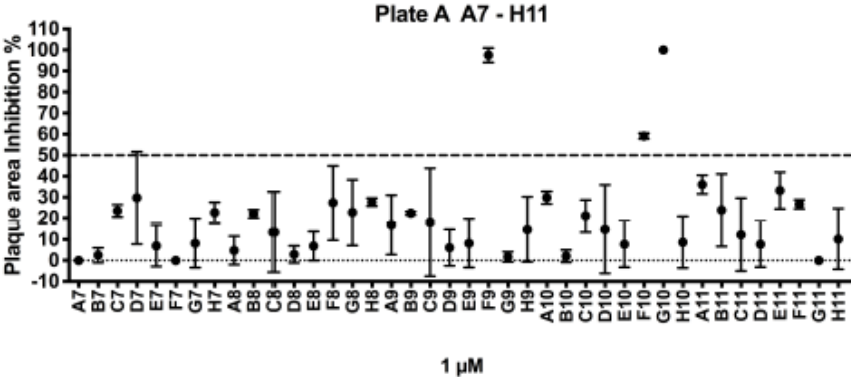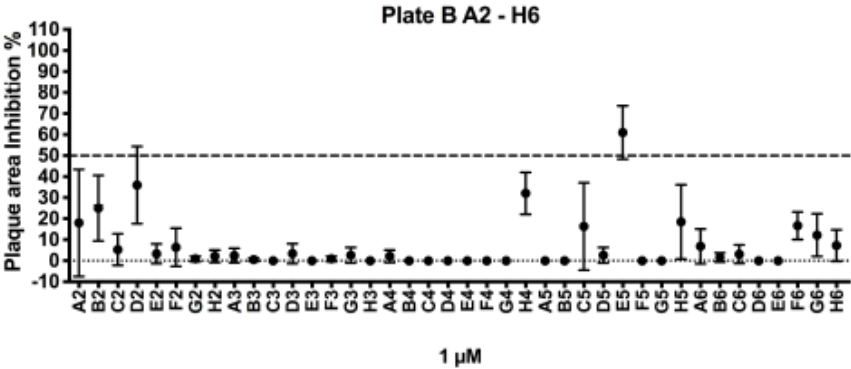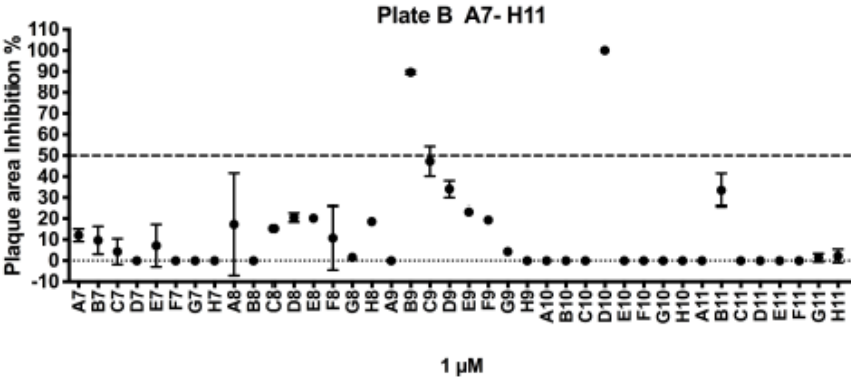

Supplementary Figure S1 continuation

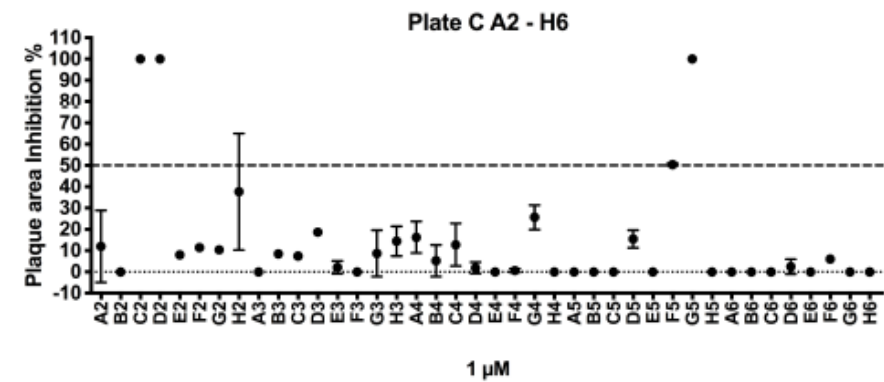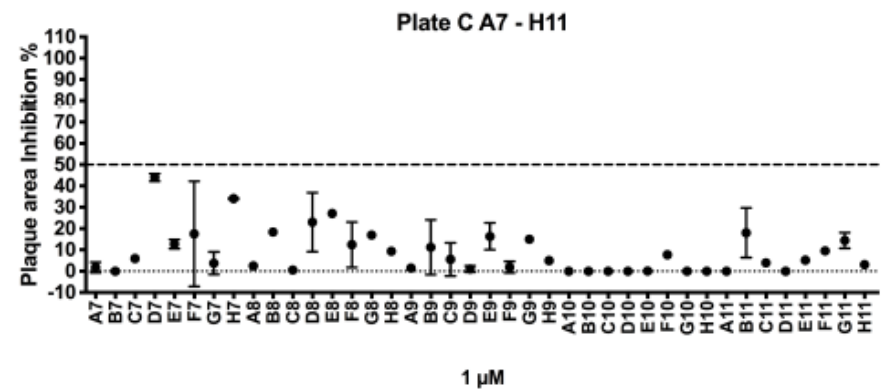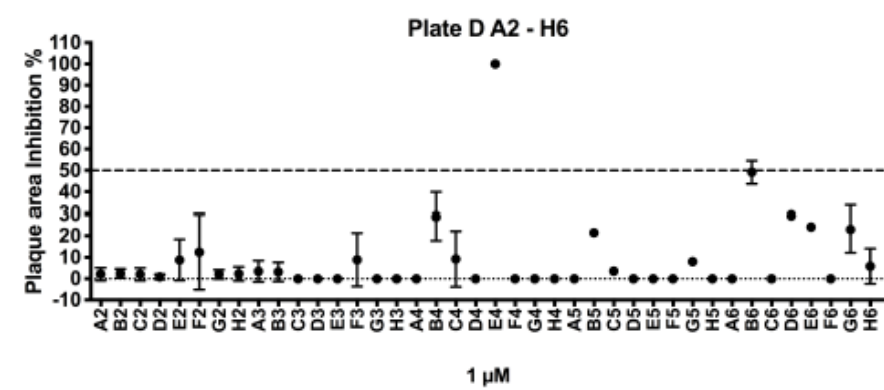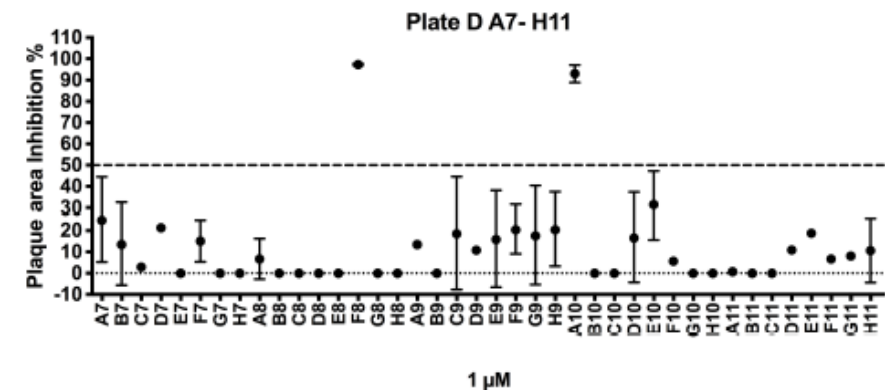

## Supplementary Figure S1 continuation

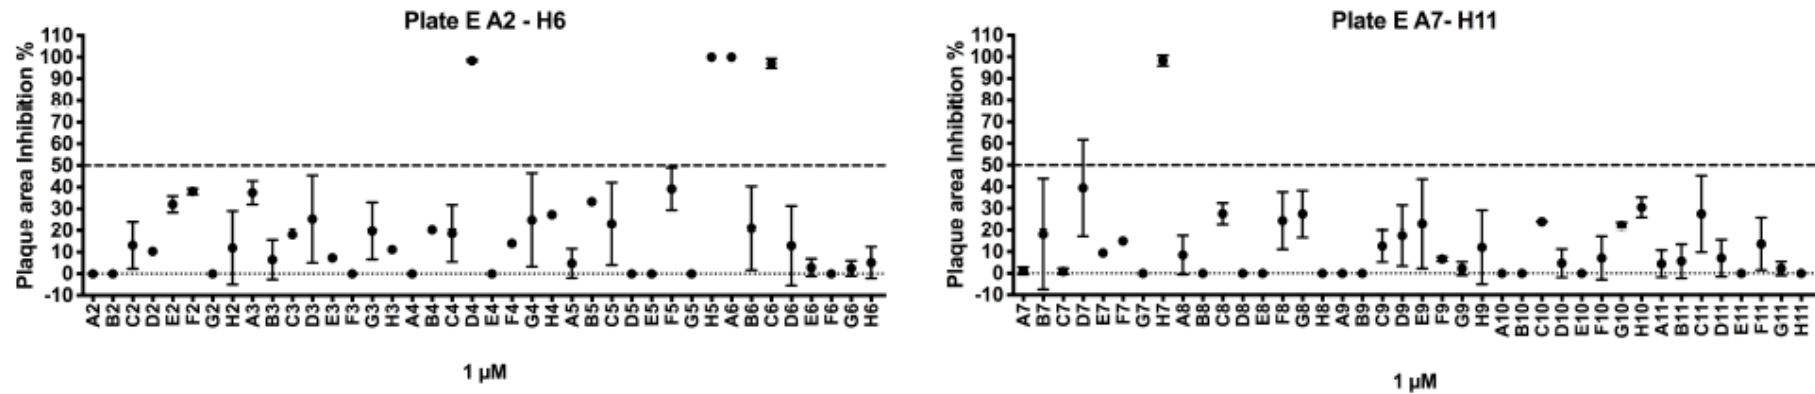

Figure S1. Preliminary screening of the 400 drugs and drug-like compounds contained in the Pandemic box. NDHF monolayers in 6-well plates were infected with 1,000 tachyzoites of *T. gondii* and treated for 7 days with compounds. The inhibitory activity was evaluated by measuring the percentage of monolayer destruction compared to the untreated group. Results represent the mean  $\pm$  standard deviation of two independent experiments.

## Supplementary Figure S2

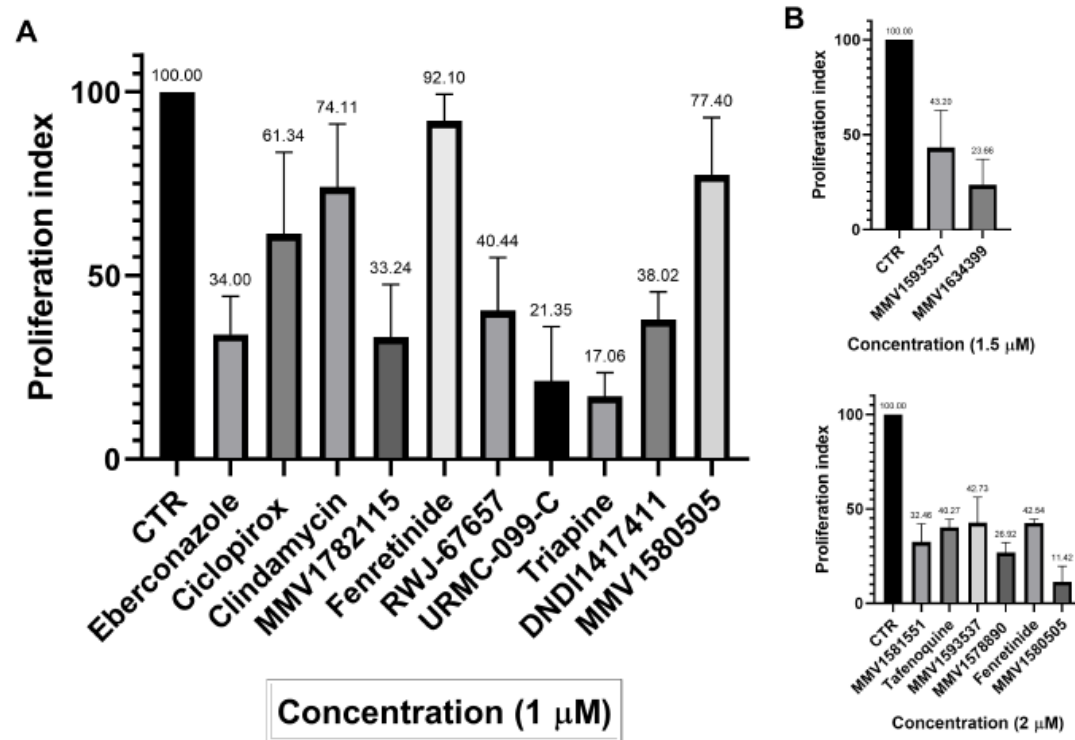

Figure S2. A-C. Antiproliferative assay in NHDF cells infected with 5:1 tachyzoites of the RH strain of *T. gondii* after 48 hours of treatment in increasing concentrations on a micromolar scale. A. Proliferation index of selected compounds from Pandemic Box at 1 µM concentration. B. Proliferation index of selected compounds from Pandemic Box at 1.5 µM concentration. C. Proliferation index of selected compounds from Pandemic Box at 2 µM concentration. Values represent mean  $\pm$  SD of three experiments. CTR= Control.
